# Supplementary material for: Understanding of how Propionibacterium acidipropionici respond to propionic acid stress at the level of proteomics
Source: PubMed Central journal article supplement (PMC4223659; doi:10.1038/srep06951), 2014-11-07
Supplement: srep06951-s1.pdf [file srep06951-s1.pdf]

## Supplementary Information

### Understanding of how *Propionibacterium acidipropionici* respond to propionic acid stress at the level of proteomics

Ningzi Guan<sup>1,2</sup>, Hyun-dong Shin<sup>3</sup>, Rachel R. Chen<sup>3</sup>, Jianghua Li<sup>1,4</sup>, Long Liu<sup>1,4\*</sup>, Guocheng Du<sup>4\*</sup>,  
Jian Chen<sup>4</sup>

<sup>1</sup>Key Laboratory of Carbohydrate Chemistry and Biotechnology, Ministry of Education, Jiangnan University, Wuxi 214122, China

<sup>2</sup>Key Laboratory of Industrial Biotechnology, Ministry of Education, Jiangnan University, Wuxi 214122, China

<sup>3</sup>School of Chemical and Biomolecular Engineering, Georgia Institute of Technology, Atlanta 30332, USA

<sup>4</sup>Synergetic Innovation Center Of Food Safety and Nutrition, Wuxi 214122, China

Corresponding authors: Long Liu, Tel.: +86-510-85918312, Fax: +86-510-85918309, E-mail: longliu@jiangnan.edu.cn; Guocheng Du, Tel.: +86-510-85918309, Fax: +86-510-85918309, E-mail: gcdu@jiangnan.edu.cn.

Table S1: Primers used in PCR for recombinant strains construction

|             | <b>Sense Primer (5'-3')</b>                   | <b>Anti-sense Primer (5'-3')</b>       |
|-------------|-----------------------------------------------|----------------------------------------|
| <i>gap</i>  | CATG <u>CCATGG</u> CAATGACCGTCAAGGTTGGTAT     | CCCAAGCTTTCAGAGCTTGTCTGGCAAC           |
| <i>sec</i>  | CATG <u>CCATGG</u> CAGTGCGCGACGATGACCTTG      | CCCAAGCTTTCATGGCGTCACCCCG              |
| <i>atpA</i> | GGGAATTCCATATGGCCGACAAGTTACCC                 | GGAAGATATCTCAGGACCTCTTCGTGGC           |
| <i>pntB</i> | GGGAATTCCATATGGTCTCCTCGAACTGATT               | CGGGTACCCTACTTGGCGTCGGCCGT             |
| <i>mce</i>  | CATG <u>CCATGGG</u> CATGAGTAATGAGGATCTTTTCATC | AAGGAAAAAAGCGGCCGCTCAGTTCTTCGGGTACTGG  |
| <i>cpr</i>  | CATG <u>CCATGGG</u> CAGCAGTGGCAGTGGCAAG       | AAGGAAAAAAGCGGCCGCTCACCACACATCACGCAGAT |

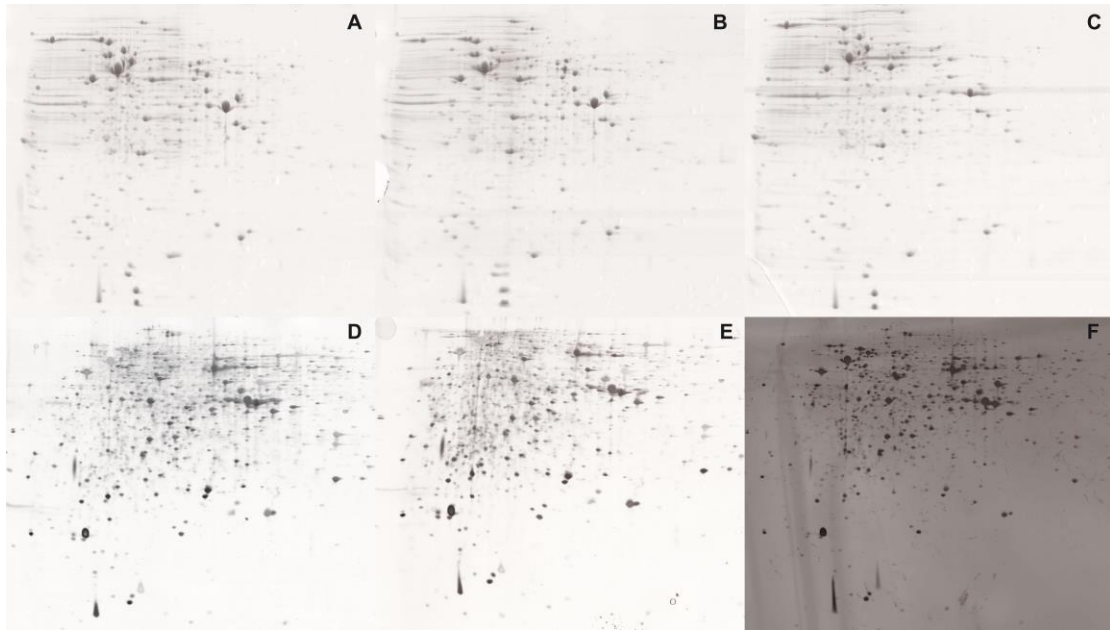

**Figure S1:** Protein profile of the parental strain (A-C) and the shuffled strain (D-F) on the gel.

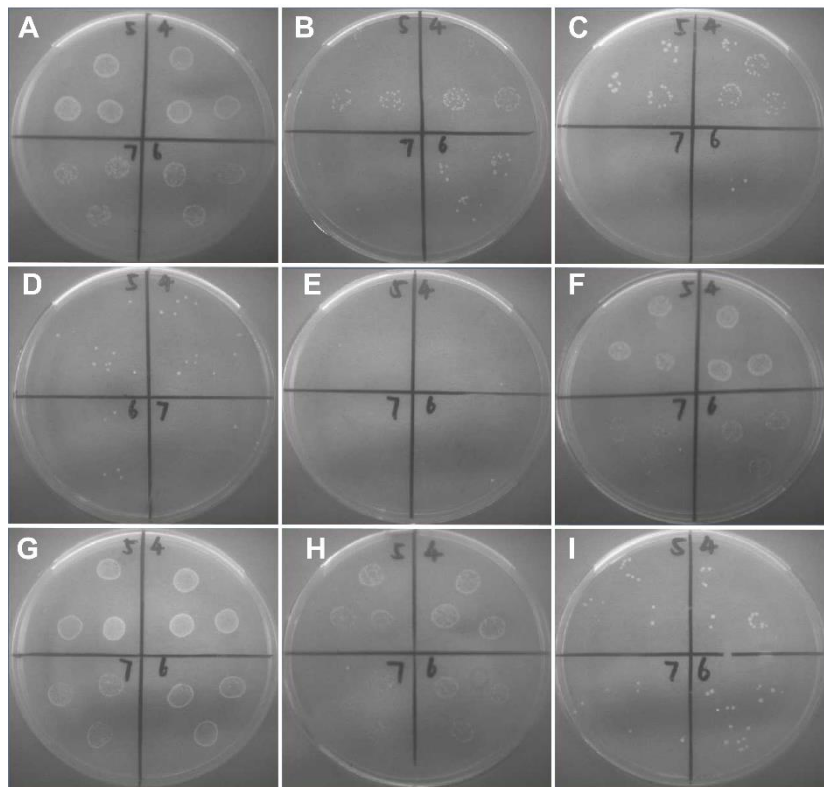

**Figure S2:** A portion of the culture dishes of recombinant strains grown with additional acids used in viable-cell counting. (A. Ec-1, without acid; B. Ec-c, 1 g/L propionic acid; C. Ec-1, 2 g/L propionic acid; D. Ec-a, 2 g/L propionic acid; E. Ec-p, 4 g/L acetic acid; F. Ec-g, 1 g/L propionic acid; G. Ec-s, 1 g/L propionic acid; H. Ec-s, 2 g/L propionic acid; I. Ec-m, 1 g/L propionic acid)
